# Supplementary material for: The Antifungal Potential of Sarvacrol against <em>Penicillium digitatum</em> through 1H-NMR Based Metabolomics Approach
Source: Preprints.org preprint supplement (doi:10.20944/preprints201905.0301.v1), 2019-05-24
Supplement: Supplementary file 1 [file supplementary]

# Supplementary Material: The Antifungal Potential of Carvacrol against *Penicillium Digitatum* through <sup>1</sup>H-NMR Based Metabolomics approach

Chunpeng Wan, Yuting Shen, Muhammad Farrukh Nisar, Wenwen Qi, Chuying Chen and Jinyin Chen

Table S1. Chemical shifts assignment of metabolites.

| No | Metabolites            | Chemical Shifts (ppm)                            |
|----|------------------------|--------------------------------------------------|
| 1  | Isoleucine             | 0.92–0.945, 1.005–1.025, 1.215–1.305, 3.66–3.685 |
| 2  | Leucine                | 0.96–0.975, 0.945–0.955, 1.65–1.70               |
| 3  | Valine                 | 0.98–1.005, 1.03–1.06, 2.245–2.28, 3.62–3.64     |
| 4  | Lactate                | 1.325–1.355                                      |
| 5  | Alanine                | 1.47–1.5, 3.775–3.805                            |
| 6  | Lysine                 | 1.70–1.765, 1.90–1.94, 2.995–3.035               |
| 7  | Putrescine             | 1.765–1.795, 3.035–3.055                         |
| 8  | 4-Aminobutyrate        | 1.87–1.90, 2.28–2.325, 2.975–3.005               |
| 9  | Acetate                | 1.94–1.95                                        |
| 10 | Glutamate              | 2.025–2.105, 2.325–2.375                         |
| 11 | Acetaminophen          | 2.13–2.145, 6.88–6.925, 7.175–7.21               |
| 12 | Succinate              | 2.395–2.415                                      |
| 13 | Glutamine              | 2.45–2.485, 2.15–2.175                           |
| 14 | Glutathione            | 2.49–2.525, 2.545–2.58                           |
| 15 | 5-6-Dihydrouracil      | 2.625–2.675, 3.39–3.425                          |
| 16 | Aspartate              | 2.675–2.725, 2.79–2.85, 3.875–3.895              |
| 17 | Sarcosine              | 2.755–2.77, 3.63–3.64                            |
| 18 | Phenylalanine          | 3.11–3.13, 3.25–3.31                             |
| 19 | Ethanolamine           | 3.13–3.16                                        |
| 20 | Choline                | 3.20–3.215                                       |
| 21 | Betaine                | 3.24–3.25, 3.875–3.885                           |
| 22 | Arginine               | 3.25–3.275, 1.95–1.96                            |
| 23 | Methanol               | 3.355–3.365                                      |
| 24 | Glycine                | 3.56–3.575                                       |
| 25 | $\pi$ -Methylhistidine | 3.745–3.75                                       |
| 26 | Uracil                 | 4.22–4.245, 4.34–4.375, 5.89–5.93                |
| 27 | Tryptophan             | 7.25–7.29, 7.525–7.55, 7.72–7.745                |
| 28 | Xanthine               | 7.91–7.93                                        |
| 29 | Adenine                | 8.195–8.25                                       |
| 30 | Formate                | 8.455–8.47                                       |
